# Supplementary material for: Potential impact of climate and socioeconomic changes on future agricultural land use in West Africa
Source: Copernicus journal article supplement (doi:10.5194/esd-7-151-2016), 2016-02-23
Supplement: Supplementary file 1 [file esd-7-151-2016-supplement.pdf]

Supplement of Earth Syst. Dynam., 7, 151–165, 2016  
<http://www.earth-syst-dynam.net/7/151/2016/>  
doi:10.5194/esd-7-151-2016-supplement  
© Author(s) 2016. CC Attribution 3.0 License.

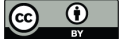

*Supplement of*

## **Potential impact of climate and socioeconomic changes on future agricultural land use in West Africa**

**Kazi Farzan Ahmed et al.**

*Correspondence to:* Guiling Wang ([gwang@enr.uconn.edu](mailto:gwang@enr.uconn.edu))

The copyright of individual parts of the supplement might differ from the CC-BY 3.0 licence.

**Table S1: Present-day (SPAM 2005) and the LandPro-projected future (mid-21<sup>st</sup> century) average crop area coverage in the West African countries.**

| Country       | Present-day coverage (%) | Future coverage (%)         |                            |
|---------------|--------------------------|-----------------------------|----------------------------|
|               |                          | <i>MIROC-driven climate</i> | <i>CESM-driven climate</i> |
| Benin         | 19.2                     | 56.5                        | 60.1                       |
| Burkina Faso  | 20.4                     | 43.0                        | 37.1                       |
| Gambia        | 31.3                     | 76.3                        | 70.6                       |
| Ghana         | 19.1                     | 41.4                        | 52.0                       |
| Guinea        | 6.8                      | 40.3                        | 42.9                       |
| Guinea-Bissau | 9.4                      | 38.5                        | 41.3                       |
| Ivory Coast   | 13.3                     | 27.7                        | 37.6                       |
| Mali          | 5.0                      | 12.0                        | 10.9                       |
| Niger         | 13.1                     | 17.8                        | 17.6                       |
| Nigeria       | 39.4                     | 84.5                        | 80.9                       |
| Senegal       | 14.6                     | 45.8                        | 42.3                       |
| Sierra Leone  | 8.7                      | 36.0                        | 39.4                       |
| Togo          | 31.6                     | 51.5                        | 60.9                       |

**Table S2: Future average crop area coverage in the West African countries under the MIROC-driven climate as projected by the LandPro algorithm following three different orders of yield values in selecting the cropping area to optimize agricultural land use. Initial scenario (best case in land use optimization): descending order of yield; alternative scenario 01 (worst case): ascending order; alternative scenario 02 (intermediate case): random order.**

| <b>Country</b> | <b>Future coverage (%)</b> |                   |                          |
|----------------|----------------------------|-------------------|--------------------------|
|                | <i>Best case</i>           | <i>Worst case</i> | <i>Intermediate case</i> |
| Benin          | 56.5                       | 75.0              | 57.2                     |
| Burkina Faso   | 43.0                       | 57.7              | 52.4                     |
| Gambia         | 76.3                       | 91.5              | 84.3                     |
| Ghana          | 41.4                       | 56.8              | 45.9                     |
| Guinea         | 40.3                       | 70.4              | 47.3                     |
| Guinea-Bissau  | 38.5                       | 80.0              | 39.4                     |
| Ivory Coast    | 27.7                       | 50.1              | 29.2                     |
| Mali           | 12.0                       | 22.0              | 16.4                     |
| Niger          | 17.8                       | 17.8              | 17.8                     |
| Nigeria        | 84.5                       | 90.4              | 89.2                     |
| Senegal        | 45.8                       | 81.3              | 67.9                     |
| Sierra Leone   | 36.0                       | 71.8              | 39.0                     |
| Togo           | 51.5                       | 73.2              | 60.1                     |

**Table S3: Future average crop area coverage in the West African countries under the MIROC-driven climate as projected by the LandPro algorithm following four different rankings of crops prioritized by the farmers to optimize agricultural land use. Rank 1: descending order of country-level crop deficit; rank 2: ascending order of country-level crop deficit; rank 3: maize, sorghum, millet, cassava, peanut; rank 4: peanut, cassava, millet, sorghum, maize.**

| <b>Country</b> | <b>Future Coverage (%)</b> |               |               |               |
|----------------|----------------------------|---------------|---------------|---------------|
|                | <i>Rank 1</i>              | <i>Rank 2</i> | <i>Rank 3</i> | <i>Rank 4</i> |
| Benin          | 56.5                       | 61.2          | 59.7          | 58.4          |
| Burkina Faso   | 43.0                       | 42.5          | 41.8          | 43.1          |
| Gambia         | 76.3                       | 73.1          | 73.1          | 79.0          |
| Ghana          | 41.4                       | 41.8          | 41.7          | 42.3          |
| Guinea         | 40.3                       | 40.3          | 40.3          | 39.5          |
| Guinea-Bissau  | 38.5                       | 38.0          | 38.0          | 38.0          |
| Ivory Coast    | 27.7                       | 27.5          | 28.4          | 27.7          |
| Mali           | 12.0                       | 11.2          | 11.0          | 12.0          |
| Niger          | 17.8                       | 17.8          | 17.8          | 17.8          |
| Nigeria        | 84.5                       | 83.7          | 83.3          | 85.9          |
| Senegal        | 45.8                       | 51.7          | 49.8          | 46.6          |
| Sierra Leone   | 36.0                       | 36.3          | 36.3          | 36.0          |
| Togo           | 51.5                       | 50.9          | 52.7          | 53.2          |

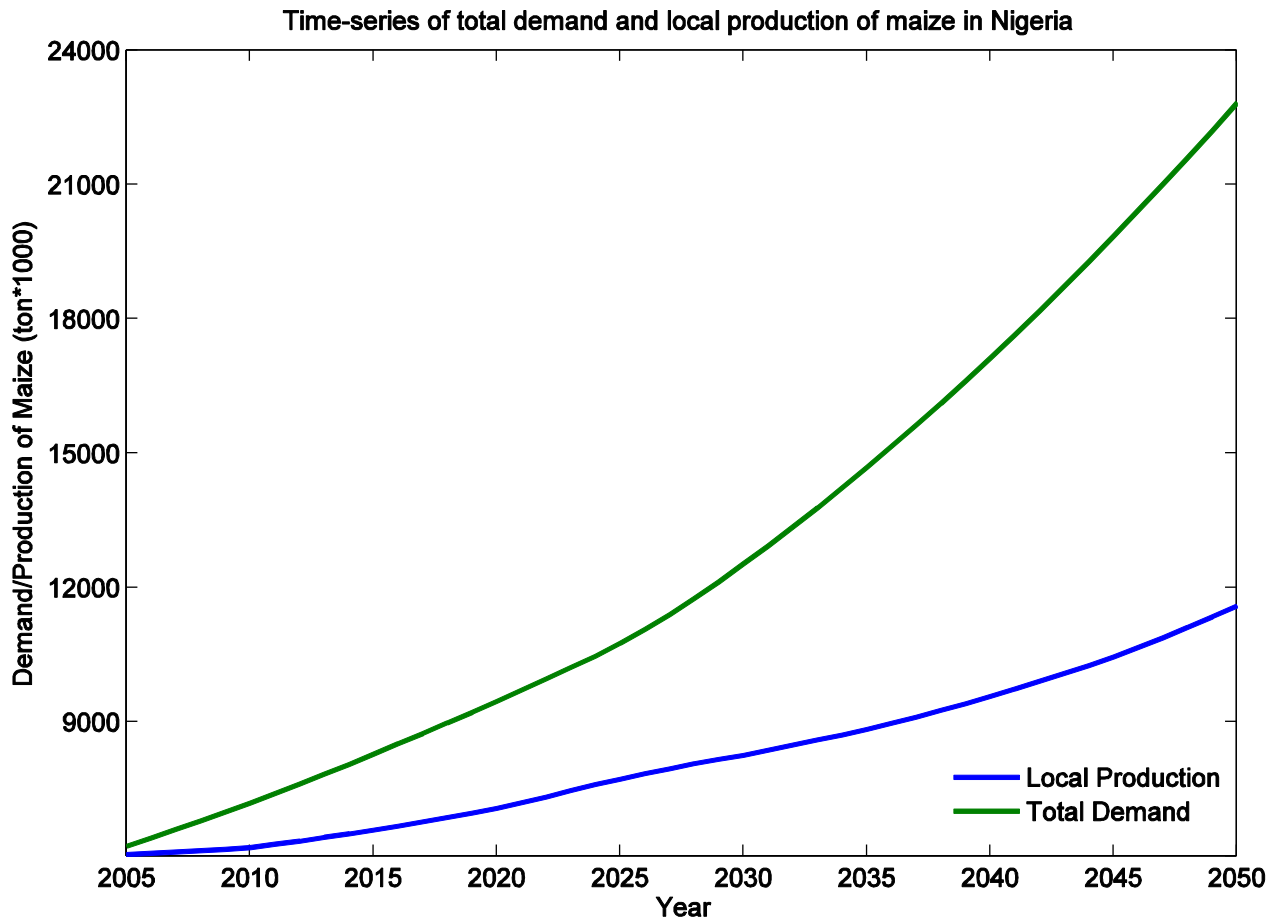

**Figure S1:** Time-series (2005-2050) of total demand and local production of maize in Nigeria according to future projection by the IMPACT model.

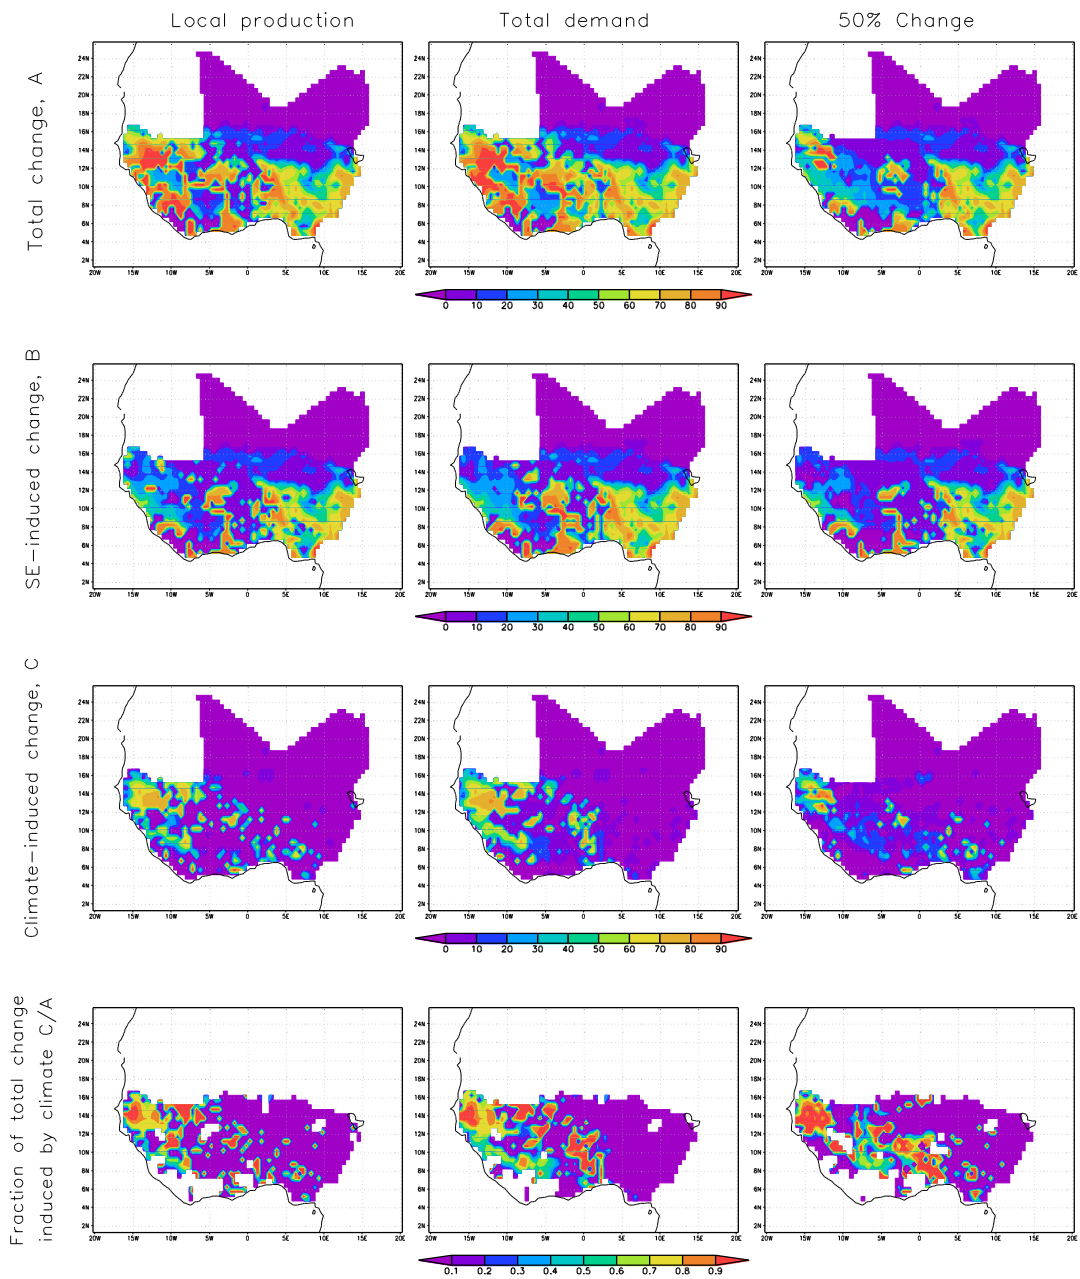

**Figure S2:** Sensitivity of land use change pattern to the demand values used as input to LandPro with the alternative cropping scenario following ascending order of yield under the MIROC-driven climate. 1<sup>st</sup> row: absolute magnitude of total change for three future scenarios of demand; 2<sup>nd</sup> row: change due to socioeconomic factors; 3<sup>rd</sup> row: change due to climatic factors; 4<sup>th</sup> row: fraction of climate-induced change to total change.
